# Supplementary material
Source: PubMed Central journal article supplement (PMC9095682)
Supplement: 41598_2022_11924_MOESM1_ESM.pdf [file 41598_2022_11924_MOESM1_ESM.pdf]

## Supplementary Information

### Curiosity for information predicts wellbeing mediated by loneliness during COVID-19 Pandemic

Losecaat Vermeer, A.B.<sup>1,2\*</sup>, Muth, A.<sup>1,2</sup>, Terenzi, D.<sup>1,2,3</sup>, Park, S.Q.<sup>1,2,3\*</sup>

<sup>1</sup> Department of Decision Neuroscience and Nutrition, German Institute of Human Nutrition  
Potsdam-Rehbrücke, Germany

<sup>2</sup> Charité-Universitätsmedizin Berlin, Corporate member of Freie Universität Berlin, Humboldt-  
Universität zu Berlin, Berlin, Germany

<sup>3</sup> Deutsches Zentrum für Diabetes, Neuherberg, Germany

## Results

### Information-seeking motives

Table S1. Mixed effect model for information-seeking

| Predictors                                           | Estimates     | 95% CI       | Statistic | p-value |
|------------------------------------------------------|---------------|--------------|-----------|---------|
| Intercept                                            | 66.22         | 63.91, 68.52 | 56.70     | <0.001  |
| Valence                                              | 7.81          | 5.92, 9.70   | 8.16      | <0.001  |
| Information target                                   | 3.17          | 1.78, 4.57   | 4.48      | <0.001  |
| Valence * Information target                         | 1.11          | 0.06, 2.14   | 2.10      | 0.037   |
| <hr/>                                                |               |              |           |         |
| N <sub>subjects</sub>                                | 183           |              |           |         |
| Marginal R <sup>2</sup> / Conditional R <sup>2</sup> | 0.114 / 0.677 |              |           |         |

Note. Contrasts were set-to-sum. Positive valence and Self as Information target were set to 1.

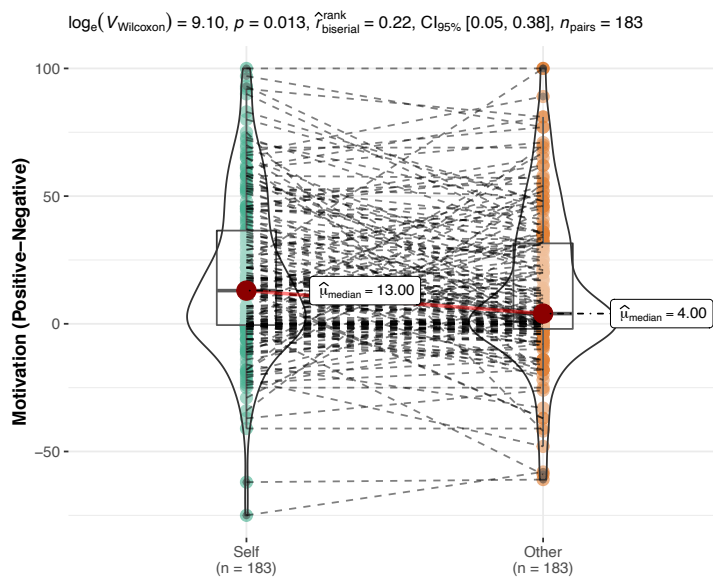

Figure S1. Motivation to seek information that is expected to be positive rather than negative, for Self and about Others.

### Curiosity, well-being, and subjective loneliness: preregistered multiple regressions

In the paper, we reported how the link between curiosity and well-being was mediated by loneliness. As loneliness is integral to the pandemic lockdown and was also found to significantly correlate with both the dependent variable well-being and curiosity variables (independent

variables) in the current study, we opted to test for a mediation of loneliness instead of the initially preregistered multiple linear regression with loneliness included as a covariate. For completeness, we report the results of the preregistered regressions below for each curiosity measure.

Importantly, the results below overlap with the mediations reported in the paper (i.e. a partial mediation of loneliness with trait curiosity as predictor, and a full mediation of loneliness for information-seeking as predictor of well-being).

**Table S2. Multiple regression for well-being (baseline) with trait curiosity as predictor including loneliness, age, gender, and residency as covariates**

| Predictors                               | Well-being (baseline) |              |           |         |
|------------------------------------------|-----------------------|--------------|-----------|---------|
|                                          | Estimates             | 95% CI       | Statistic | p-value |
| (Intercept)                              | 44.64                 | 38.54, 50.74 | 14.44     | <0.001  |
| Trait curiosity                          | 4.76                  | 3.45, 6.06   | 7.18      | <0.001  |
| Loneliness (UCLA)                        | -0.28                 | -0.34, -0.21 | -8.52     | <0.001  |
| Age                                      | 0.02                  | -0.09, 0.12  | 0.31      | 0.753   |
| Gender                                   | -0.37                 | -1.32, 0.58  | -0.76     | 0.446   |
| Residency                                | 0.21                  | -0.79, 1.21  | 0.42      | 0.677   |
| Observations                             | 183                   |              |           |         |
| R <sup>2</sup> / R <sup>2</sup> adjusted | 0.533 / 0.520         |              |           |         |

**Table S3. Multiple regression for well-being (baseline) with information-seeking as predictor including loneliness, age, gender, and residency as covariates**

| Predictors                               | Well-being (baseline) |              |           |         |
|------------------------------------------|-----------------------|--------------|-----------|---------|
|                                          | Estimates             | 95% CI       | Statistic | p-value |
| (Intercept)                              | 60.70                 | 54.67, 66.72 | 19.87     | <0.001  |
| Information-seeking self                 | 0.02                  | -0.04, 0.08  | 0.60      | 0.552   |
| Loneliness (UCLA)                        | -0.35                 | -0.42, -0.28 | -10.06    | <0.001  |
| Age                                      | 0.05                  | -0.06, 0.17  | 0.90      | 0.371   |
| Gender                                   | -0.88                 | -1.95, 0.18  | -1.63     | 0.105   |
| Residency                                | 0.93                  | -0.19, 2.05  | 1.63      | 0.104   |
| Observations                             | 183                   |              |           |         |
| R <sup>2</sup> / R <sup>2</sup> adjusted | 0.399 / 0.382         |              |           |         |

### Daily well-being and mood

Information-seeking for self on average: including loneliness and covariates for age, gender, residency into the model information-seeking for self did not significantly predict daily mental well-being ( $F(1,166) = 0.014, p = .907$ ), daily excitement ( $F(1,166) = 1.96, p = .163$ ), and daily anxiety ( $F(1,165) = 0.14, p = .705$ ).

## Curiosity and daily food intake

**Table S4. Descriptives of food composition and behavior, split for gender**

| Characteristic                  | Overall, <i>N</i> = 172 <sup>1</sup> | male, <i>N</i> = 103 <sup>1</sup> | female, <i>N</i> = 69 <sup>1</sup> | p-value <sup>2</sup> |
|---------------------------------|--------------------------------------|-----------------------------------|------------------------------------|----------------------|
| Calories                        | 1,659.23 (483.42)                    | 1,787.20 (465.34)                 | 1,467.28 (448.00)                  | <0.001               |
| Fat (%)                         | 35.48 (6.43)                         | 35.53 (5.45)                      | 35.40 (7.72)                       | 0.9                  |
| Carbs (%)                       | 46.34 (7.06)                         | 45.66 (6.79)                      | 47.36 (7.39)                       | 0.12                 |
| Protein (%)                     | 16.82 (3.47)                         | 17.61 (3.72)                      | 15.64 (2.68)                       | <0.001               |
| Sugars (%)                      | 5.92 (3.13)                          | 5.37 (3.08)                       | 6.76 (3.03)                        | 0.004                |
| Fruit & Vegetables (g/1000kcal) | 104.18 (92.74)                       | 80.74 (78.27)                     | 139.35 (101.83)                    | <0.001               |
| Curiosity (trait)               | 3.08 (0.75)                          | 3.11 (0.65)                       | 3.02 (0.88)                        | 0.4                  |
| Information-seeking self        | 69.25 (18.17)                        | 67.29 (18.31)                     | 72.17 (17.70)                      | 0.085                |
| Daily well-being                | 22.36 (3.04)                         | 22.49 (3.02)                      | 22.16 (3.09)                       | 0.5                  |
| Daily excitement                | 3.04 (0.65)                          | 3.09 (0.59)                       | 2.98 (0.72)                        | 0.3                  |
| Daily anxiety                   | 1.85 (0.64)                          | 1.73 (0.63)                       | 2.02 (0.62)                        | 0.003                |

<sup>1</sup> Mean (SD), by gender outlier values are winsorized

<sup>2</sup> Two Sample t-test

% daily energy derived

**Table S5. Full model predicting daily well-being levels**

| Predictors                               | Daily well-being (mean) |               |  | Statistic | p-value          |
|------------------------------------------|-------------------------|---------------|--|-----------|------------------|
|                                          | Estimates               | 95% CI        |  |           |                  |
| (Intercept)                              | 27.38                   | -16.37, 71.14 |  | 1.24      | 0.218            |
| Curiosity (trait)                        | -1.39                   | -14.79, 12.01 |  | -0.21     | 0.838            |
| Carbohydrates                            | -0.09                   | -0.62, 0.44   |  | -0.33     | 0.739            |
| Fat                                      | 0.02                    | -0.57, 0.61   |  | 0.07      | 0.948            |
| Sugar                                    | -0.34                   | -1.18, 0.50   |  | -0.81     | 0.421            |
| Fruit and Vegetables                     | 0.01                    | -0.02, 0.03   |  | 0.58      | 0.560            |
| Age                                      | -0.00                   | -0.05, 0.05   |  | -0.08     | 0.933            |
| Gender                                   | 0.26                    | -0.20, 0.73   |  | 1.12      | 0.265            |
| Residency (GER, AT)                      | -0.03                   | -0.50, 0.45   |  | -0.11     | 0.912            |
| Loneliness                               | -0.08                   | -0.11, -0.05  |  | -5.7      | <b>&lt;0.001</b> |
| Curiosity (trait) * Carbohydrates        | 0.05                    | -0.12, 0.21   |  | 0.56      | 0.575            |
| Curiosity (trait) * Fat                  | -0.00                   | -0.18, 0.18   |  | -0.03     | 0.972            |
| Curiosity (trait) * Sugar                | 0.12                    | -0.13, 0.38   |  | 0.94      | 0.347            |
| Curiosity (trait) * Fruit and Vegetables | -0.00                   | -0.01, 0.01   |  | -0.61     | 0.545            |
| Observations                             | 170                     |               |  |           |                  |
| R <sup>2</sup> / R <sup>2</sup> adjusted | 0.345 / 0.290           |               |  |           |                  |

Note: Trait curiosity remained significant ( $t(164)=3.72$ ,  $p<.001$ ) in the reduced (winning) model (including loneliness, age, gender, residency) based on model comparison, but for completeness of the food variables, we report the full model here.

**Table S6. Full model predicting daily excitement levels**

| Predictors                               | Daily excitement (mean) |              |           |              |
|------------------------------------------|-------------------------|--------------|-----------|--------------|
|                                          | Estimates               | 95% CI       | Statistic | p-value      |
| (Intercept)                              | 2.80                    | -7.45, 13.04 | 0.54      | 0.591        |
| Curiosity (trait)                        | 0.50                    | -2.64, 3.63  | 0.31      | 0.755        |
| Carbohydrates                            | 0.00                    | -0.12, 0.13  | 0.08      | 0.940        |
| Fat                                      | 0.03                    | -0.11, 0.17  | 0.41      | 0.683        |
| Sugar                                    | -0.11                   | -0.30, 0.09  | -1.10     | 0.275        |
| Fruit and Vegetables                     | 0.00                    | -0.01, 0.01  | 0.11      | 0.915        |
| Age                                      | -0.02                   | -0.03, -0.01 | -3.06     | <b>0.003</b> |
| Gender                                   | 0.01                    | -0.10, 0.12  | 0.20      | 0.839        |
| Residency (GER, AT)                      | 0.04                    | -0.08, 0.15  | 0.63      | 0.529        |
| Loneliness                               | -0.01                   | -0.02, -0.00 | -2.97     | <b>0.003</b> |
| Curiosity (trait) * Carbohydrates        | -0.00                   | -0.04, 0.04  | -0.13     | 0.894        |
| Curiosity (trait) * Fat                  | -0.01                   | -0.05, 0.03  | -0.49     | 0.627        |
| Curiosity (trait) * Sugar                | 0.03                    | -0.03, 0.09  | 0.87      | 0.387        |
| Curiosity (trait) * Fruit and Vegetables | 0.00                    | -0.00, 0.00  | 0.20      | 0.842        |
| Observations                             | 170                     |              |           |              |
| R <sup>2</sup> / R <sup>2</sup> adjusted | 0.211 / 0.146           |              |           |              |

Note: Trait curiosity remained significant ( $t(164) = 2.41, p = 0.017$ ) in the winning (reduced) model (including loneliness, age, gender, residency) based on model comparison, but for completeness of the food variables, we report the full model here.

**Table S7. Full model predicting daily anxiety levels**

| Predictors                               | Daily anxiety (mean) |              |           |                  |
|------------------------------------------|----------------------|--------------|-----------|------------------|
|                                          | Estimates            | 95% CI       | Statistic | p-value          |
| (Intercept)                              | -2.43                | -11.96, 7.09 | -0.50     | 0.615            |
| Curiosity (trait)                        | 1.09                 | -1.82, 4.00  | 0.74      | 0.461            |
| Carbohydrates                            | 0.05                 | -0.07, 0.16  | 0.80      | 0.426            |
| Fat                                      | 0.00                 | -0.13, 0.13  | 0.03      | 0.980            |
| Sugar                                    | 0.25                 | 0.07, 0.43   | 2.69      | <b>0.008</b>     |
| Fruit and Vegetables                     | -0.00                | -0.01, 0.00  | -1.39     | 0.167            |
| Age                                      | -0.00                | -0.01, 0.01  | -0.74     | 0.459            |
| Gender                                   | -0.11                | -0.21, 0.00  | -1.97     | 0.050            |
| Residency (GER, AT)                      | 0.02                 | -0.09, 0.12  | 0.29      | 0.768            |
| STAI (trait)                             | 0.02                 | 0.01, 0.03   | 3.65      | <b>&lt;0.001</b> |
| Loneliness                               | 0.00                 | -0.00, 0.01  | 1.10      | 0.275            |
| Curiosity (trait) * Carbohydrates        | -0.02                | -0.05, 0.02  | -0.87     | 0.383            |
| Curiosity (trait) * Fat                  | 0.00                 | -0.04, 0.04  | 0.05      | 0.958            |
| Curiosity (trait) * Sugar                | -0.08                | -0.13, -0.02 | -2.71     | <b>0.007</b>     |
| Curiosity (trait) * Fruit and Vegetables | 0.00                 | -0.00, 0.00  | 1.09      | 0.278            |
| Observations                             | 170                  |              |           |                  |
| R <sup>2</sup> / R <sup>2</sup> adjusted | 0.302 / 0.239        |              |           |                  |

## Methods

Table and plots were created using “gtsummary”<sup>1</sup>, “sjPlot”<sup>2</sup> and “ggstatsplot”<sup>3</sup>.

## Questionnaires

### COVID-19 impact

We assessed the impact COVID-19 had on participants' lives by asking them to rate how well they complied with the rules, their current work situation (e.g. home-office), and whether they or others they knew contracted the virus (data presented in Figure S2, Table S8):

- Work situation: "Arbeiten Sie zur Zeit im Homeoffice bzw. arbeiten/studieren/lernen Sie von zu Hause aus?" ["Do you currently work from home, e.g., work/study/learn from home?"] (answers: 1=Yes, 2=No, I go to the office, 3=No, I am not working at the moment, 4=No, I have lost my job due to COVID-19).

### Work situation during COVID-19 lockdown

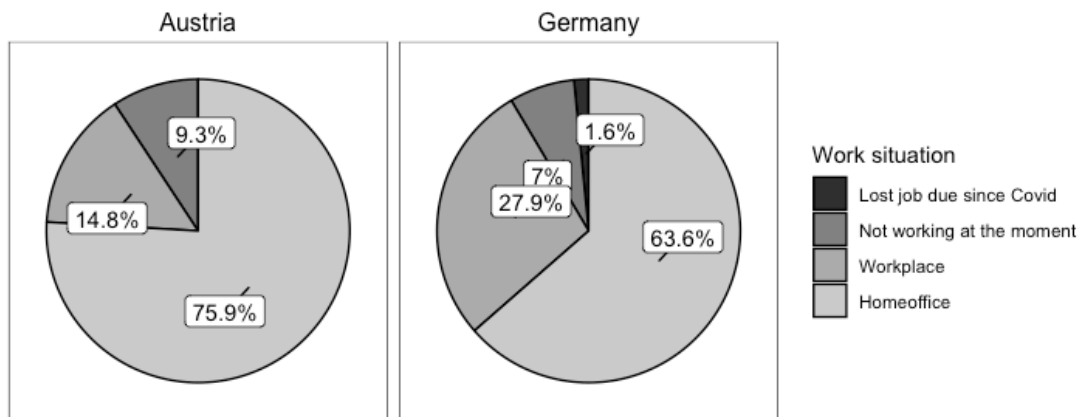

**Figure S2.** Work situation of the German and Austrian sample. The pie charts illustrate that majority of the participants in our study were working from home.

- Compliance to COVID-19 restrictions, setup by the Government: "Wie streng befolgen Sie die von der Regierung beschlossenen Regeln und Empfehlungen bezüglich der Einschränkung sozialer Kontakte?" ["How strictly do you follow the rules and recommendations adopted by the government regarding the restriction of social contacts?" (answer: 0 = not at all, 100 = very strict)].

- Experience with virus (direct, indirect): (1) "Gibt es in Ihrem näheren persönlichen Umfeld eine an Covid-19 erkrankte Person?" ["Is there someone in your immediate personal environment who has Covid-19?"] (answer options: 1=Yes, in my environment; 2=Yes, I am or was sick with Covid19 myself; 3=No); (2) "Kümmern oder kümmern Sie sich um eine an Covid-19 erkrankte Person?" ["Do

you take care of a person suffering from Covid-19?”] (answer options: 1=Yes, currently; 2=Yes, in the past; 3=No).

**Table S8. COVID-19 impact, split by country**

|                                     | Overall, N = 183 <sup>1</sup> | Austria, N = 54 <sup>1</sup> | Germany, N = 129 <sup>1</sup> | P <sup>2</sup> |
|-------------------------------------|-------------------------------|------------------------------|-------------------------------|----------------|
| Follows Covid-19 restrictions       | 82.33 (19.71)                 | 84.07 (15.15)                | 81.60 (21.34)                 | >0.9           |
| Covid-19 infection - self           | 2 / 183 (1.1%)                | 2 / 54 (3.7%)                | 0 / 129 (0%)                  | 0.086          |
| Covid-19 infection - social network | 41 / 183 (22%)                | 12 / 54 (22%)                | 29 / 129 (22%)                | >0.9           |
| Covid-19 patient caretaker          |                               |                              |                               | 0.8            |
| - Yes, currently                    | 2 / 183 (1.1%)                | 1 / 54 (1.9%)                | 1 / 129 (0.8%)                |                |
| - Yes, previously                   | 3 / 183 (1.6%)                | 1 / 54 (1.9%)                | 2 / 129 (1.6%)                |                |
| - No                                | 178 / 183 (97%)               | 52 / 54 (96%)                | 126 / 129 (98%)               |                |

<sup>1</sup> Mean (SD); n / N (%)

<sup>2</sup> Wilcoxon rank sum test; Fisher's exact test; Pearson's Chi-squared test

There were no statistical differences between the Austrian and German samples concerning the impact of COVID-19.

### Information-seeking motivation

Four questions assess how willing individuals are to seek information regarding positive and negative information, for themselves and about others in current times. For all questions, participants are asked to rate their motivation using a slider from I am definitely not motivated to look for information (0) to I am highly motivated to look for information (100) [German: Ich bin gar nicht motiviert nach Informationen zu suchen (0) -- Ich bin sehr motiviert nach Informationen zu suchen (100)]. See below.

Wie viele Informationen suchen Sie in AKTUELLEN Zeiten (z.B. im Internet, durch Lesen, Fernsehen, Fragen an Freunde/Familie/etc.). [How much information do you look for in CURRENT times (e.g. on the Internet, by reading, watching TV, asking friends / family / etc.).]

1. Wie sehr sind Sie gewillt, nach Informationen zu suchen, wenn diese Informationen wahrscheinlich POSITIV sind? (also gute Nachrichten, z.B. bezüglich Covid-19, Geld gewinnen; Gehaltserhöhung; guter medizinischer Screening-Test) [How motivated are you to seek information, when that information is likely POSITIVE? (i.e. good news, e.g. regarding Covid-19, gain money; salary increase; good medical screening test)]
2. Wie sehr sind Sie gewillt, nach Informationen zu suchen, wenn diese Informationen wahrscheinlich NEGATIV sind? (also schlechte Nachrichten, z.B. bezüglich Covid-19, Geld verlieren; Lohnkürzung erhalten; schlechter medizinischer Screening-Test) [How motivated

are you to seek information, when that information is likely NEGATIVE? (i.e. bad news, e.g., regarding Covid-19, losing money; receive a wage cut; bad medical screening test)]

3. Wie sehr sind Sie gewillt, nach Informationen zu suchen, wenn diese Informationen über Andere wahrscheinlich POSITIV sind? (also gute Nachrichten) [How motivated are you to seek information, when that information about others is likely POSITIVE? (i.e. good news about others)]
4. Wie sehr sind Sie gewillt, nach Informationen zu suchen, wenn diese Informationen über Andere wahrscheinlich NEGATIV sind? (also schlechte Nachrichten) [How motivated are you to seek information, when that information about others is likely NEGATIVE? (i.e. bad news about others)]

## References

1. Sjoberg DD, Whiting K, Curry M, Lavery JA, Larmarange J. (2021). Reproducible summary tables with the gtsummary package. *The R Journal*, **13**:570–80. <https://doi.org/10.32614/RJ-2021-053>.
2. Lüdecke D (2021). sjPlot: Data Visualization for Statistics in SocialScience. R package version 2.8.8, <https://CRAN.R-project.org/package=sjPlot>
3. Patil, I. (2021). Visualizations with statistical details: The 'ggstatsplot' approach. *Journal of Open Source Software*, **6**(61), 3167, doi:10.21105/joss.03167
